# Supplementary material for: Reconstructing B cell lineage trees with minimum spanning tree and genotype abundances
Source: PubMed Central journal article supplement (PMC9972711; doi:10.1186/s12859-022-05112-z), 2023-02-27
Supplement: 12859_2022_5112_MOESM2_ESM.pdf [file 12859_2022_5112_MOESM2_ESM.pdf]

# Reconstructing B cell lineage trees with minimum spanning tree and genotype abundances

## Supplementary Algorithm

Nika Abdollahi<sup>1,3</sup>, Lucile Jeusset<sup>1,2</sup>, Anne de Septenville<sup>2</sup>, Frédéric Davi<sup>2</sup> and Juliana Silva Bernardes<sup>1,\*</sup>

<sup>1</sup>Sorbonne Université, CNRS, UMR 7238, Laboratoire de Biologie Computationnelle et Quantitative, Paris, France

<sup>2</sup>Sorbonne Université, AP-HP, Hôpital Pitié-Salpêtrière, Department of Biological Hematology, Paris, France

<sup>3</sup>IMGT<sup>®</sup>, the international ImMunoGeneTics Information System, CNRS, Institute of Human Genetics, Montpellier, France

\*To whom correspondence should be addressed; E-mail: juliana.silva\_bernardes@upmc.fr.

November 30, 2022

---

### Algorithm 1: COAR algorithm

---

**Require:**  $T_1, T_2$ , sequences, GapPenalties

$COAR \leftarrow 0$

$N_L \leftarrow 0$  {Number of Leaves}

**for all** leaf  $i \in T_1$  **do**

$N_L \leftarrow N_L + 1$

$p_i \leftarrow path(i, T_1)$

$P \leftarrow paths(i, T_2)$  {take all paths in  $T_2$  containing  $i$ }

$minScore_i \leftarrow inf$

    {Compute a scoring matrix for sequences associated to nodes in  $p_i \cup P$  based on negative hamming distances}

$M \leftarrow scoreMatrix(P, p_i, sequences)$

**for all**  $p_j \in P$  **do**

$scoreAln_i \leftarrow NWS(p_i, p_j, M, GapPenalties)$

**if**  $scoreAln_i > minScore_i$  **then**

$minScore_i \leftarrow scoreAln_i$

**end if**

**end for**

$COAR_i \leftarrow \frac{minScore_i}{min(M)}$

$COAR \leftarrow COAR + COAR_i$

**end for**

**return**  $\frac{COAR}{N_L}$

---

COAR algorithm requires two comparable trees  $T_1$  and  $T_2$ , a set of nucleotide sequences, and Gap penalties. For each leaf  $i \in T_1$ , we find its path until the root, named  $p_i$ . We also compute  $P$ , a list of paths in  $T_2$ , containing  $i$ . Note that if  $i$  is a leaf in  $T_2$ , then  $|P| = 1$ , otherwise  $|P| > 1$ . We then compute a scoring matrix  $M$  for all nodes in  $p_i \cup P$ , each element of  $M$  contains the negative hamming distance between nodes' representative sequences. For instance, let  $a$  and  $b$  be nodes, and  $S_a = 'ACCA'$  and  $S_b = 'CCCC'$  the nucleotide sequences associated with those nodes. Then  $M_{a,b} = -2$ . Next, for each  $p_j \in P$ , we align it with  $p_i$  to obtain the  $scoreAln_i$ . For that, we use the Needleman-Wunsch (NWS) algorithm, requiring the scoring matrix, previously computed, and Gap Penalties. In order to avoid gaps in the longest path, we use an NWS version that puts the longest sequence in the columns of the dynamic programming matrix and uses different gap penalties: 0 for the gap left (GL) and -inf for the gap top (GT). In case of  $|P| > 1$ , we keep the

minimum alignment score for  $i$ . Finally, we compute  $\text{COAR}_i$  as the ratio between  $\text{minScore}_i$  and the minimum value in  $M$ . We iterate until we compute  $\text{COAR}_i$  for all  $i \in T_1$ , and we return the average: the overall COAR divided by the number of leaves in  $T_1$ . We illustrate a iteration of COAR algorithm above.
